# Supplementary material for: Robust TiO2/BDD heterojunction photoanodes for determination of chemical oxygen demand in wastewaters
Source: Royal Society of Chemistry journal article supplement (doi:10.1039/c1ay05193h), 2011-01-01
Supplement: c1ay05193h.pdf [file c1ay05193h.pdf]

## Supporting information

### Robust $\text{TiO}_2/\text{BDD}$ heterojunction photoanodes for determination of chemical oxygen demand in wastewaters

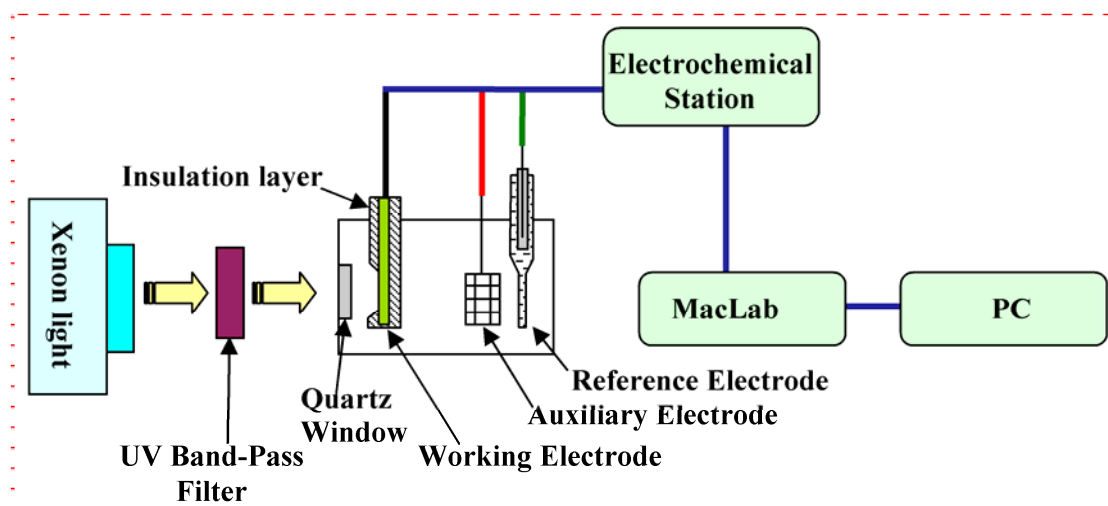

**Figure S1.** Schematic diagram of the three-electrode photoelectrochemical bulk cell for photoelectrochemical characterisation of the  $\text{TiO}_2/\text{BDD}$  electrode

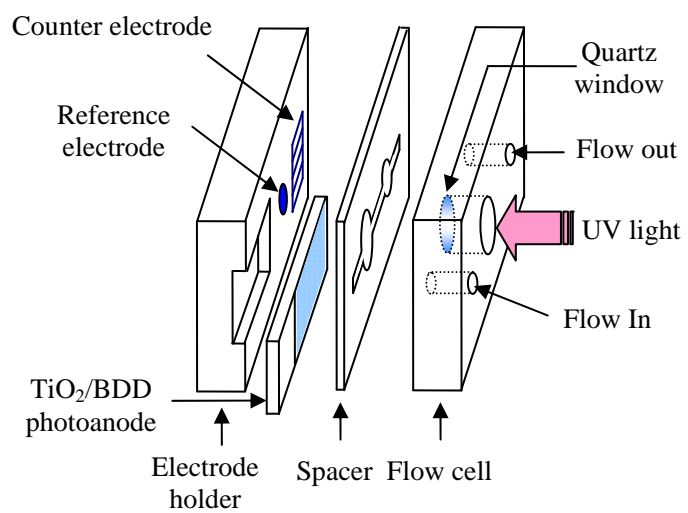

Figure S2. Schematic diagram of the design of the thin-layer photoelectrochemical cell.

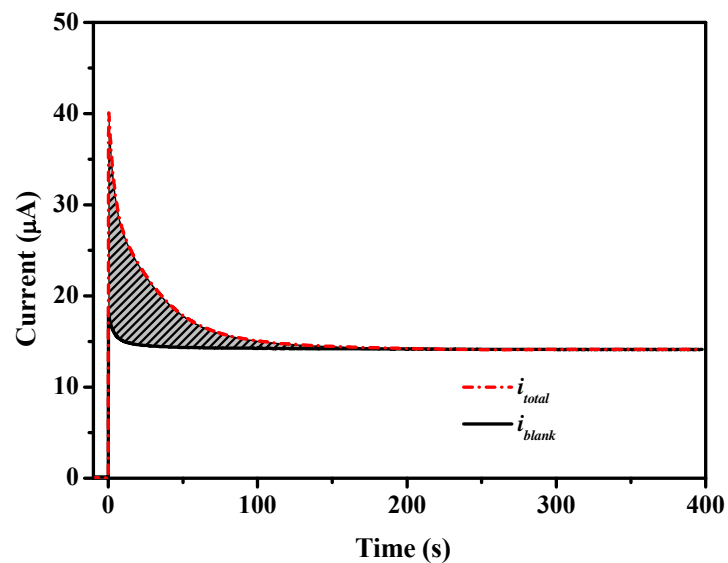

**Figure S3.** PeCOD analytical principle: Typical photocurrent responses of a blank solution containing 2.0M NaNO<sub>3</sub> ( $i_{blank}$ , solid line) and a sample containing 2.0M NaNO<sub>3</sub> and organic compounds solution ( $i_{total}$ , dash line). The shaded area indicates the charge originated from the complete oxidation of organic compounds in the thin-layer cell.

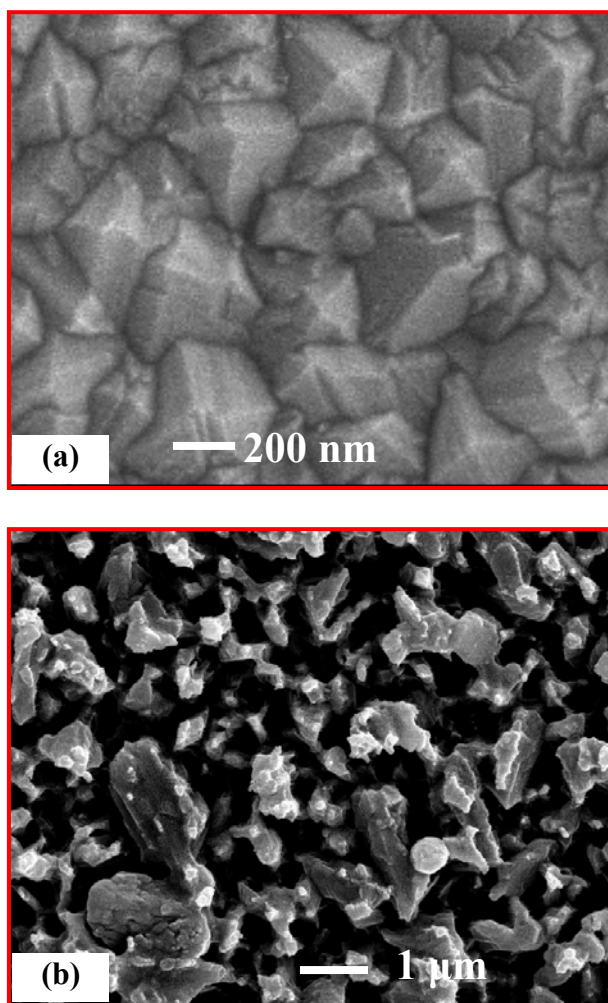

**Figure S4.** SEM images of original BDD after the aqua regia washing process (a), and sintered BDD electrodes after 700°C calcination in air (b).
